# Supplementary material for: Multiple Interventions for Diabetic Foot Ulcer Treatment Trial (MIDFUT): study protocol for a randomised controlled trial
Source: PubMed Central journal article supplement (PMC7245399; doi:10.1136/bmjopen-2019-035947), 2020-04-19
Supplement: bmjopen-2019-035947.reviewer_comments.pdf [file bmjopen-2019-035947.reviewer_comments.pdf]

## PEER REVIEW HISTORY

BMJ Open publishes all reviews undertaken for accepted manuscripts. Reviewers are asked to complete a checklist review form (<http://bmjopen.bmj.com/site/about/resources/checklist.pdf>) and are provided with free text boxes to elaborate on their assessment. These free text comments are reproduced below.

## ARTICLE DETAILS

|                            |                                                                                                                                                                                                                                                                                                                                                                                    |
|----------------------------|------------------------------------------------------------------------------------------------------------------------------------------------------------------------------------------------------------------------------------------------------------------------------------------------------------------------------------------------------------------------------------|
| <b>TITLE (PROVISIONAL)</b> | Multiple Interventions for Diabetic Foot Ulcer Treatment Trial (MIDFUT): Study Protocol for a randomised controlled trial                                                                                                                                                                                                                                                          |
| <b>AUTHORS</b>             | Brown, Sarah; Nixon, Jane; Ransom, Myka; Gilberts, Rachael; Dewhurst, Nikki; McGinnis, Elizabeth; Longo, Roberto; Game, Frances; Bojke, Chris; Chadwick, Paul; Chandrasekar, Akila; Chetter, IC; Collier, Howard; Fernandez, Catherine; Homer-Vanniasinkam, Shervanthi; Jude, Edward; Leigh, Richard; Lomas, Richard; Vowden, Peter; Wason, James; Sharples, Linda; Russell, David |

This article was not externally reviewed at BMJ Open. Protocols that have been independently assessed prior to submission to BMJ Open are usually fast-tracked to publication on the grounds that further substantial changes will not be possible. This independent assessment will usually be external, independent review for both a substantial grant award from a non-commercial or government funder and ethics approval.
